# Supplementary material for: High performance porous carbon through hard–soft dual templates for supercapacitor electrodes
Source: Royal Society of Chemistry journal article supplement (doi:10.1039/c3ta10841d), 2013-01-01
Supplement: c3ta10841d.pdf [file c3ta10841d.pdf]

### Supporting Information:

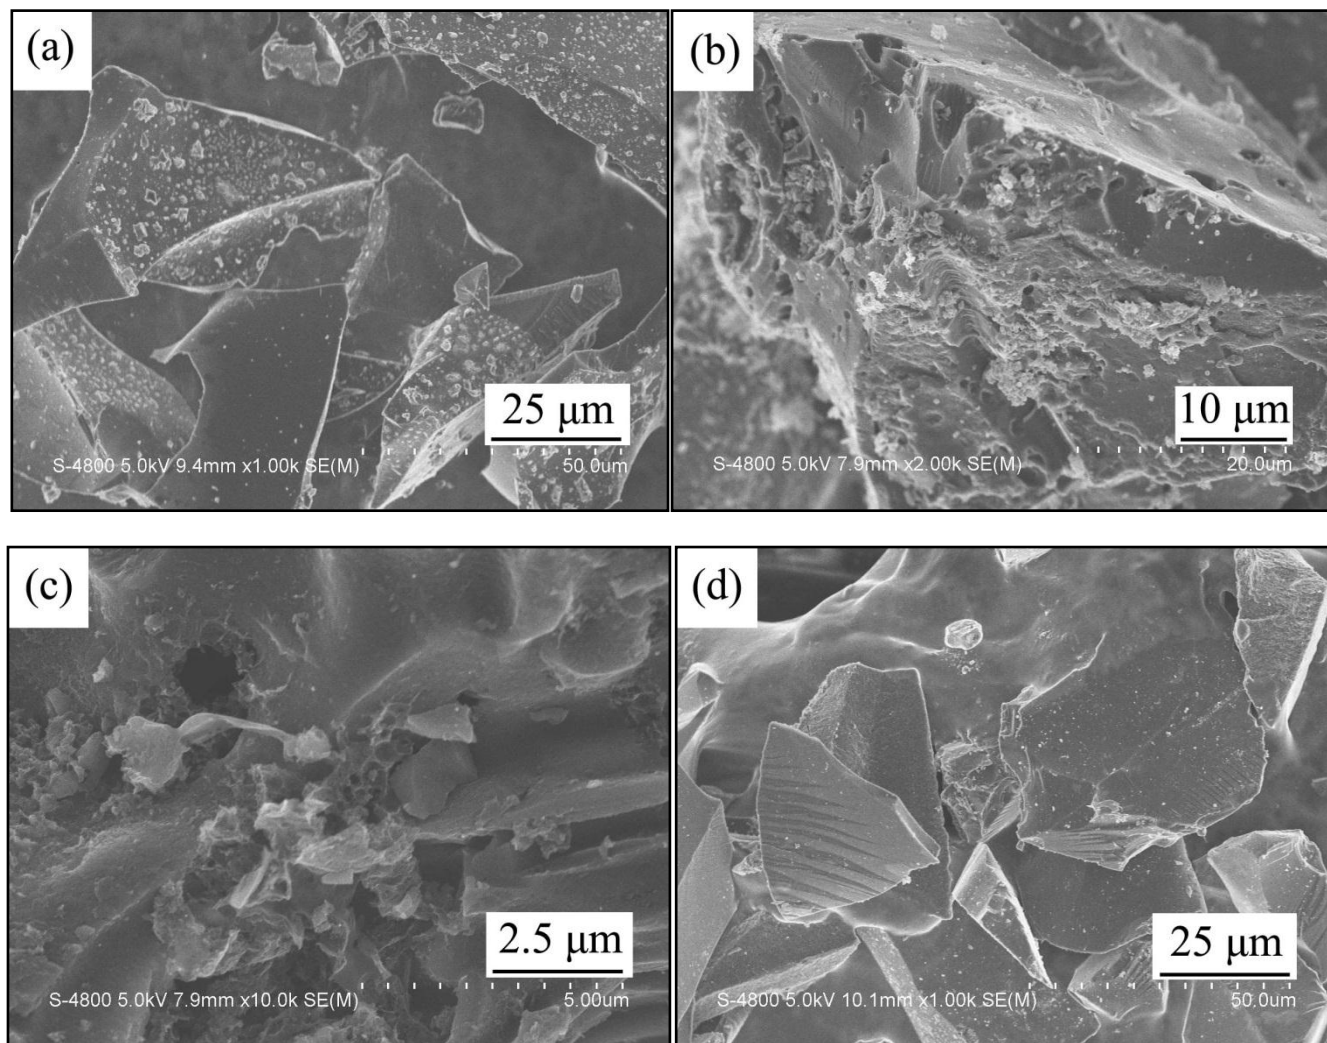

**Fig. S1.** FESEM images of carbon samples: (a) **PF-blank**; (b) **PF-Zn-1:3**; (c) **PF-Zn-1:5**; (d) **PF-PVB-1:1**.

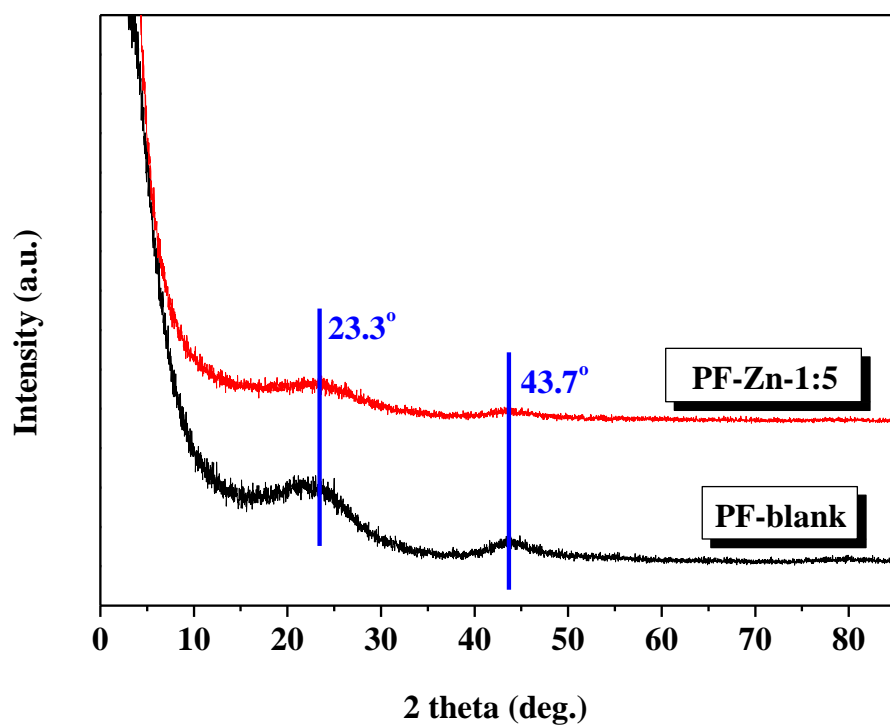

**Fig. S2.** XRD patterns of the **PF-blank** and **PF-Zn-1:5** samples.

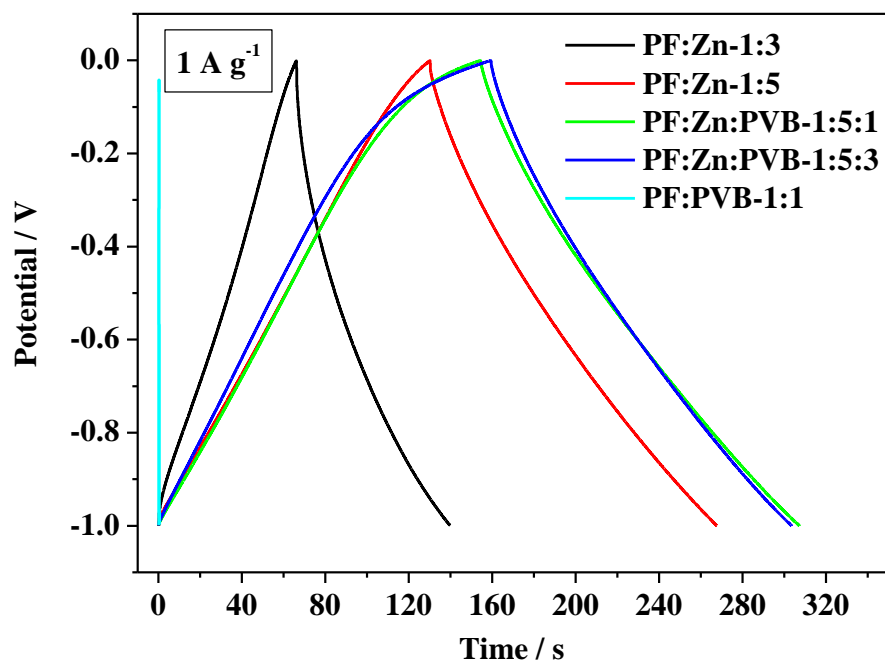

**Fig. S3.** Galvanostatic charge-discharge curves measured at a current density of  $1 \text{ A g}^{-1}$  of the carbon samples.

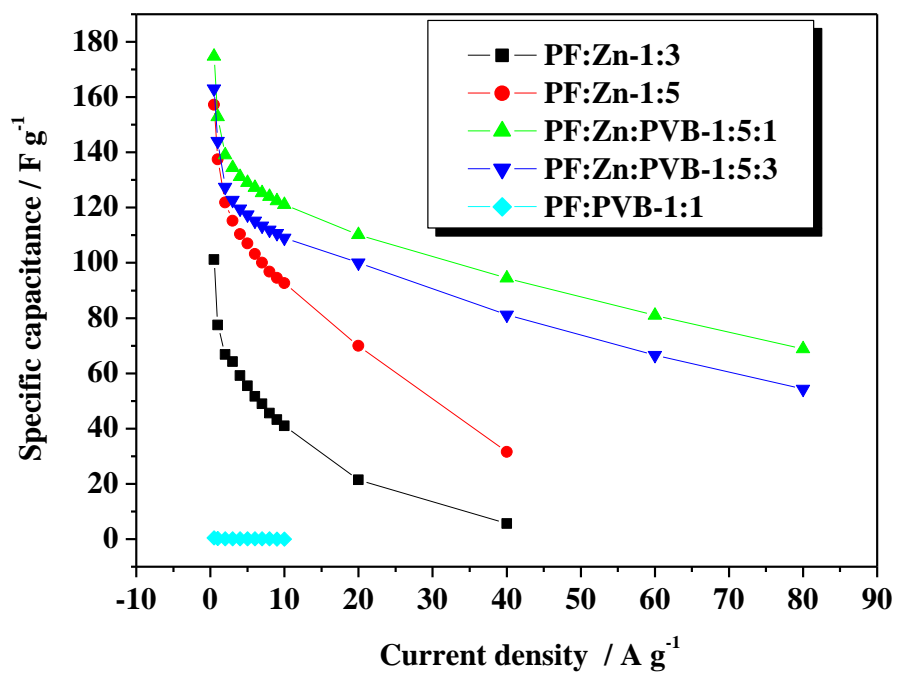

Fig. S4. Specific capacitances at various current densities of the carbon samples.

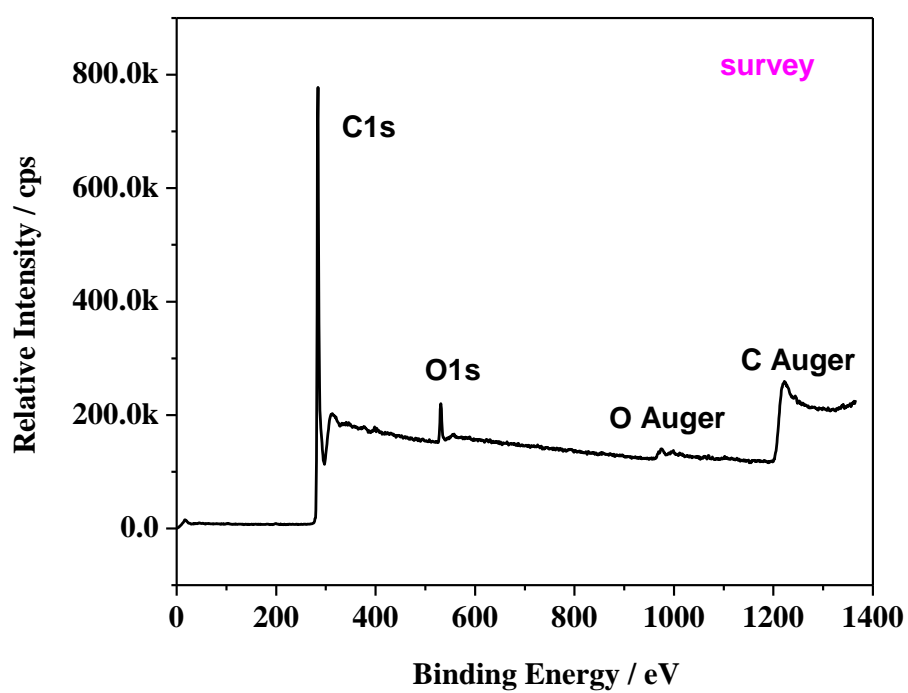

**Fig. S5.** XPS spectrum of the PF-Zn-PVB-1:5:1 sample.

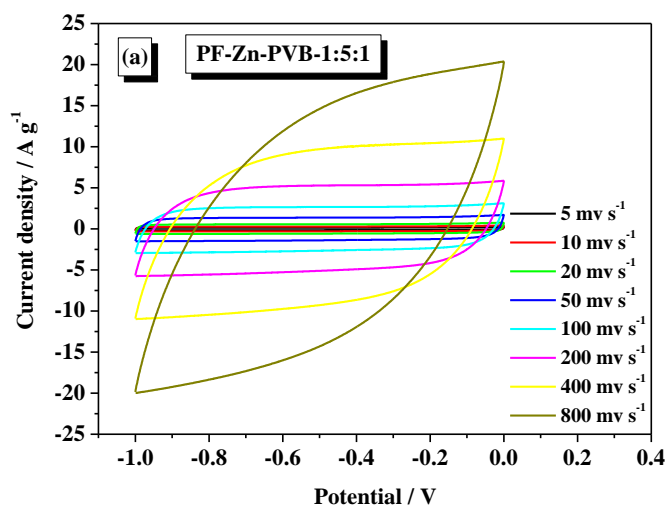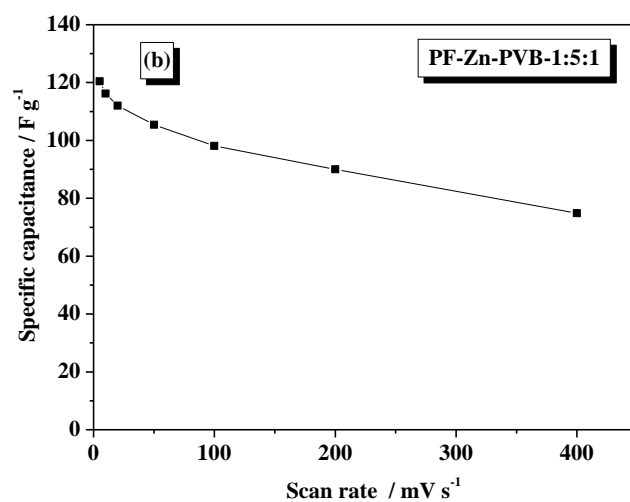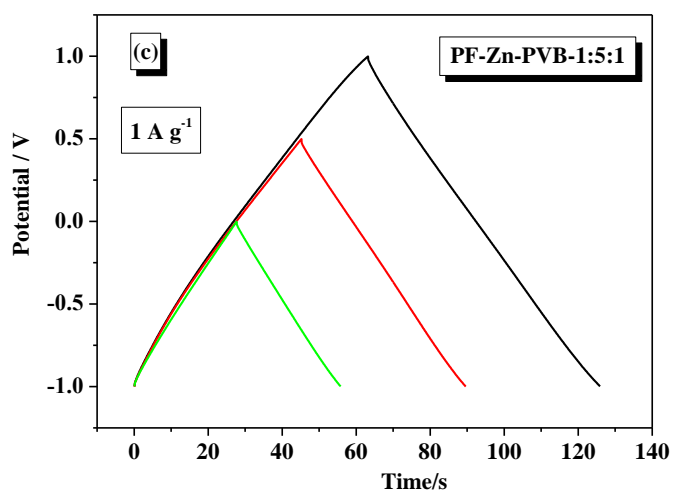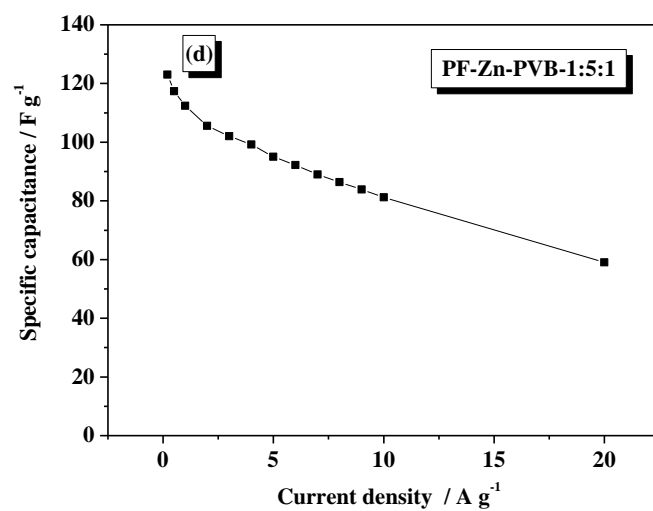

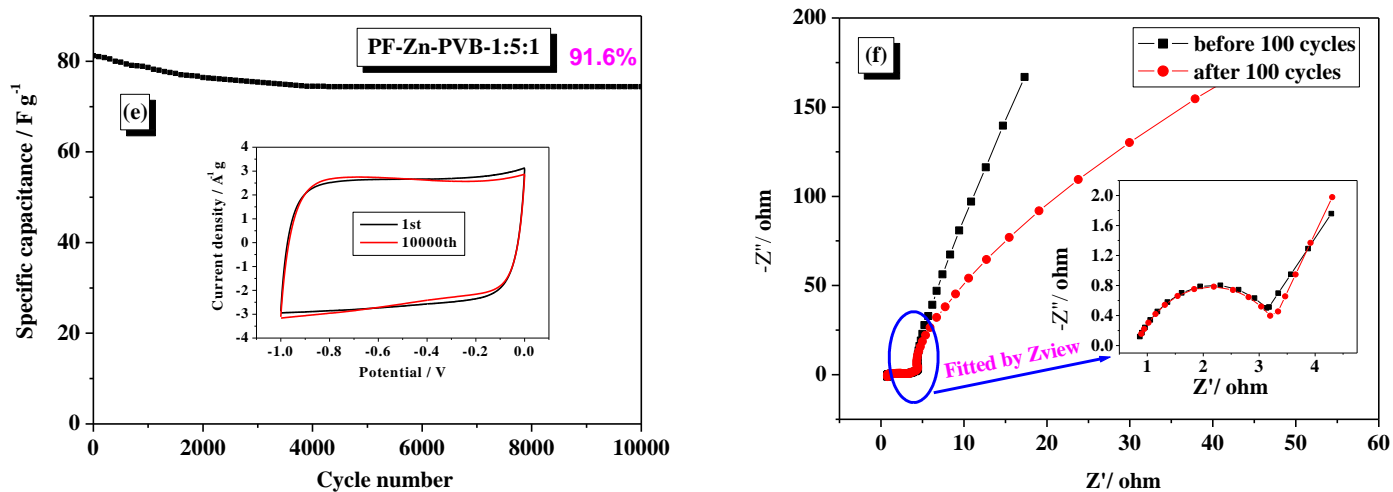

**Fig. S6. PF-Zn-PVB-1:5:1** sample: (a) Cyclic voltammograms at various scan rates; (b) Specific capacitances derived from CV tests; (c) Galvanostatic charge-discharge curves with different potential windows measured at a current density of  $1 \text{ A g}^{-1}$ ; (d) Specific capacitances at various current densities; (e) Cycling stability after 10000th cycles as well as the cyclic voltammograms of the 1st and 10000th cycles (the inset) at a current density of  $20 \text{ A g}^{-1}$ ; (f) Nyquist plots before/after 100 cycles.

**Notes:** The electrochemical results shown in Fig. S6 are measured in a two-electrode cell.

Gravimetric capacitance for a single electrode was calculated from the discharge curve in a two-electrode cell as

$$C_{\text{single}} = \frac{4I\Delta t}{m\Delta V}$$

where  $I$  (A) is the constant current and  $m$  (mg) is the total mass for both carbon electrodes,  $\Delta t$  (s) is the discharge time, and  $\Delta V$  (V) is the voltage change during the discharge process.

**Ref.** J. Han, L. L. Zhang, S. Lee, S. Park et al. *ACS NANO*, 2013, 7, 19-26.
